# Supplementary material for: Probing the structure of human tRNA3Lys in the presence of ligands using docking, MD simulations and MSM analysis
Source: Royal Society of Chemistry journal article supplement (doi:10.1039/d3ra03694d), 2023-01-01

# **Probing the Structure of human tRNA<sub>3</sub><sup>Lys</sup> in presence of ligands using docking, MD simulations and MSM analysis**

## **Supplementary Information**

Supplementary Figure S1: VAMP score calculated for different features at various lag times.

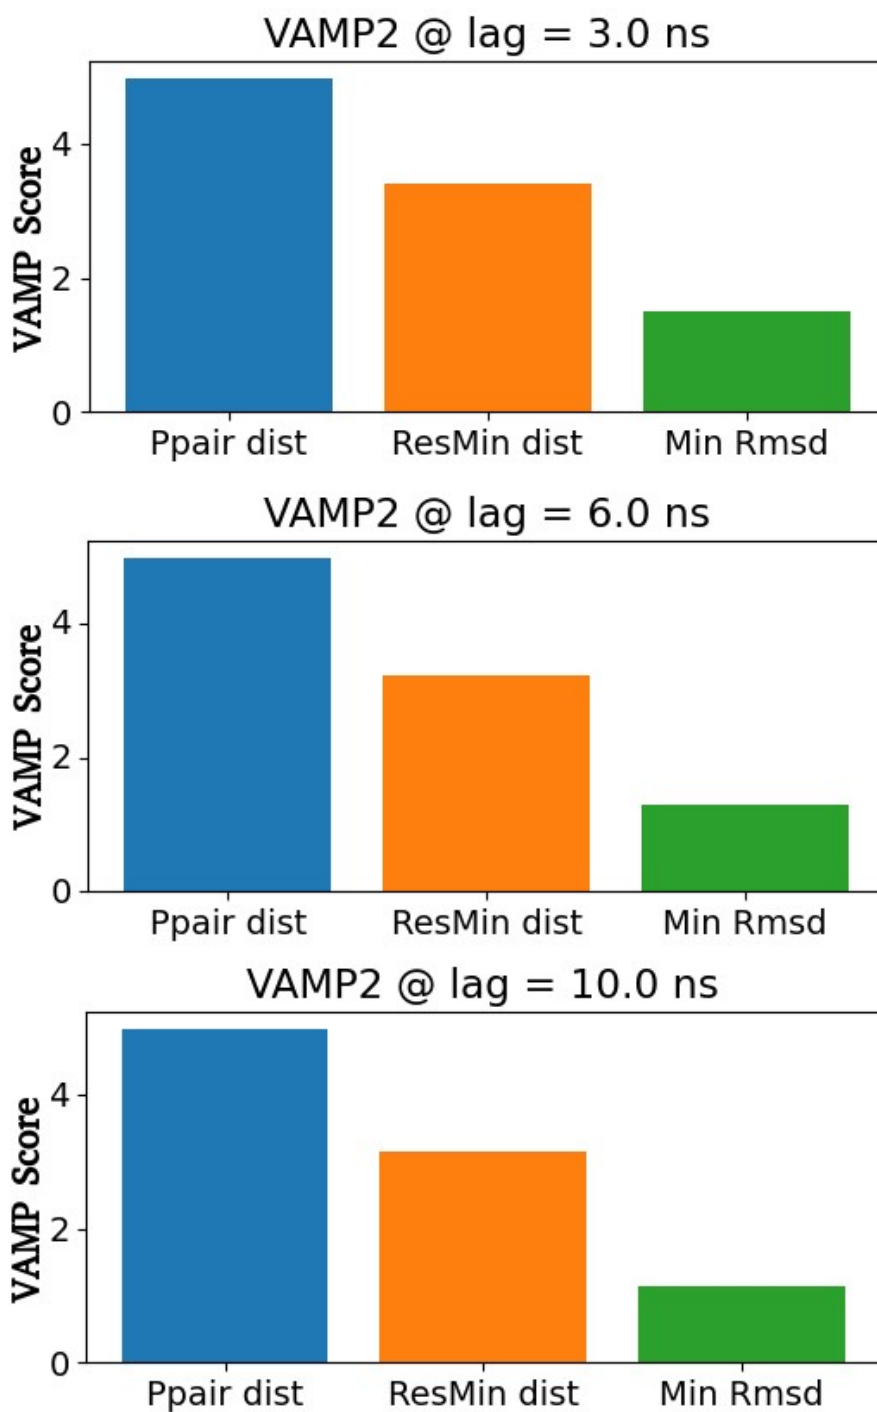

Supplementary Figure S2: Lag time for all the systems.

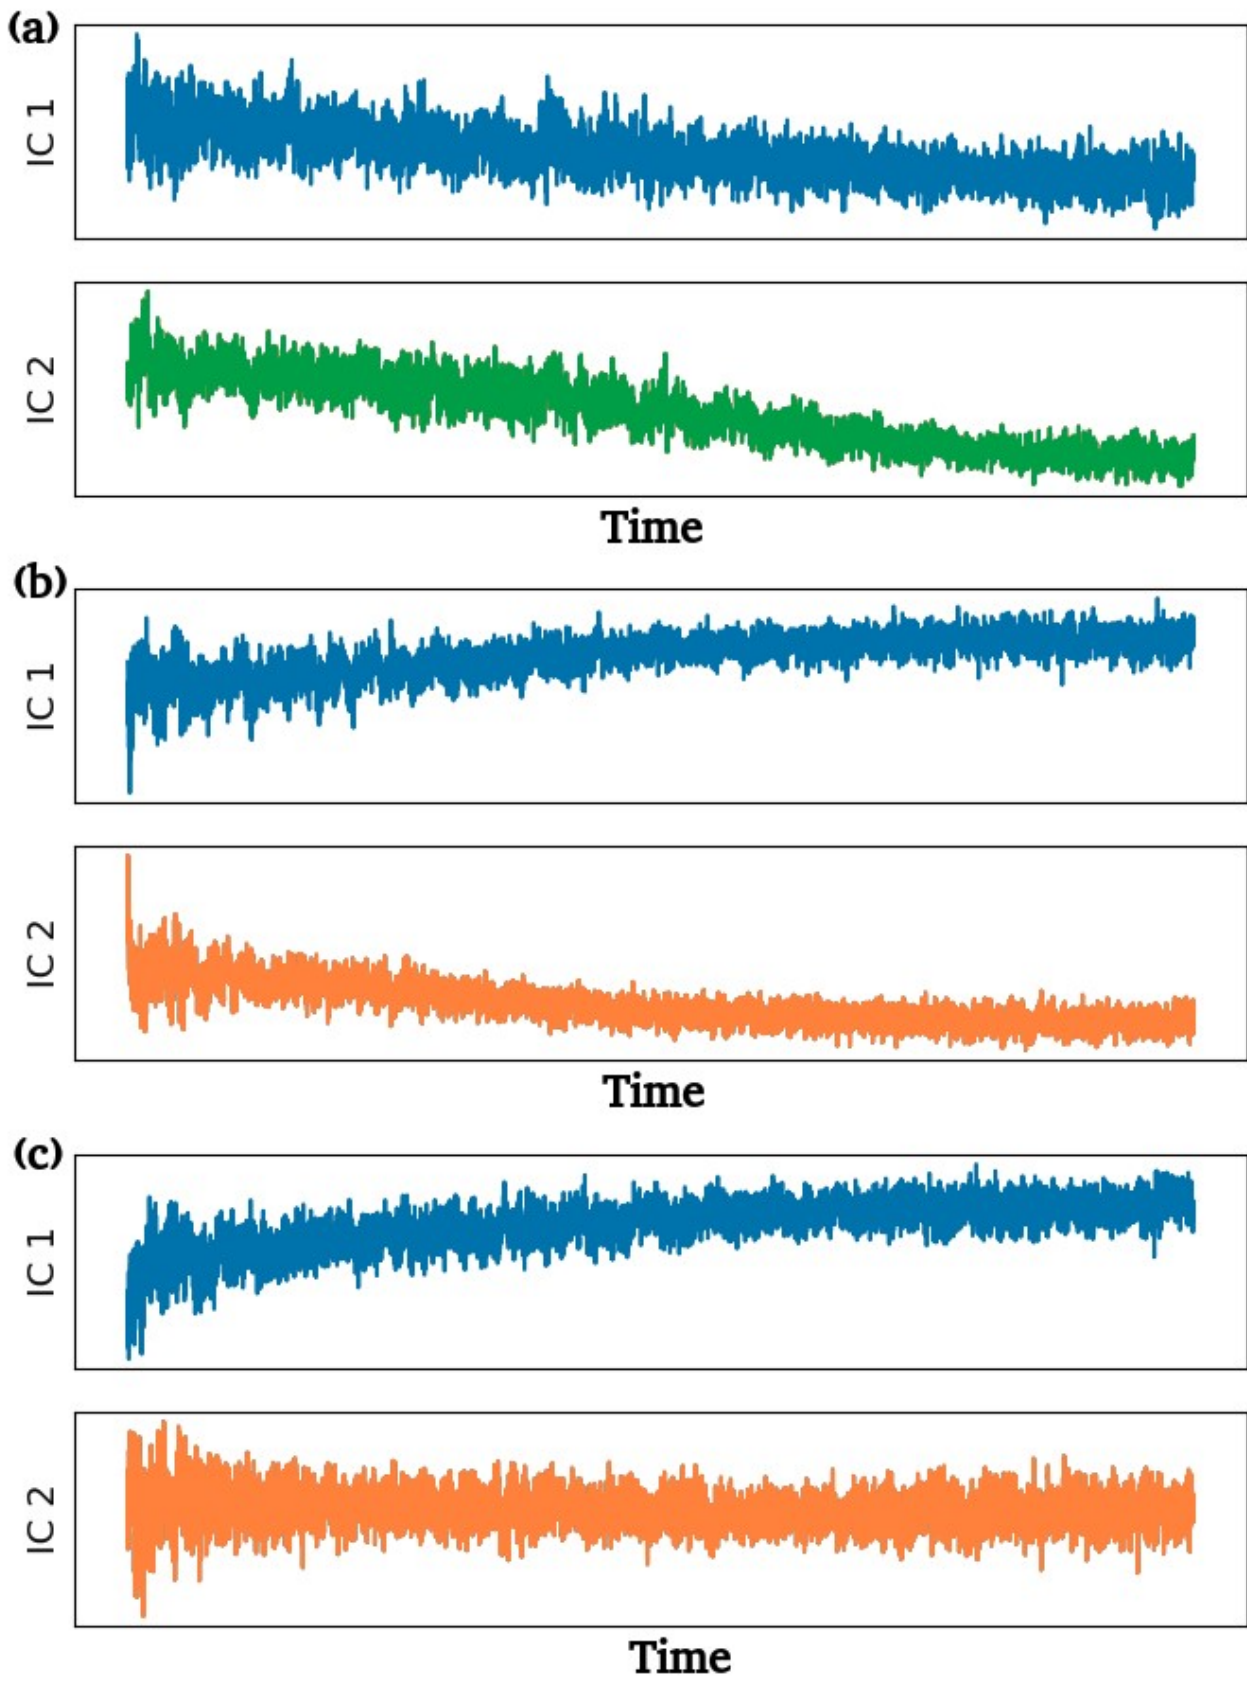

**Supplementary Figure S3:** Lag time calculation for (a) apo tRNA<sub>3</sub><sup>Lys</sup>, (b) tRNA<sub>3</sub><sup>Lys</sup>-1,4T and (c) tRNA<sub>3</sub><sup>Lys</sup>-1,5T.

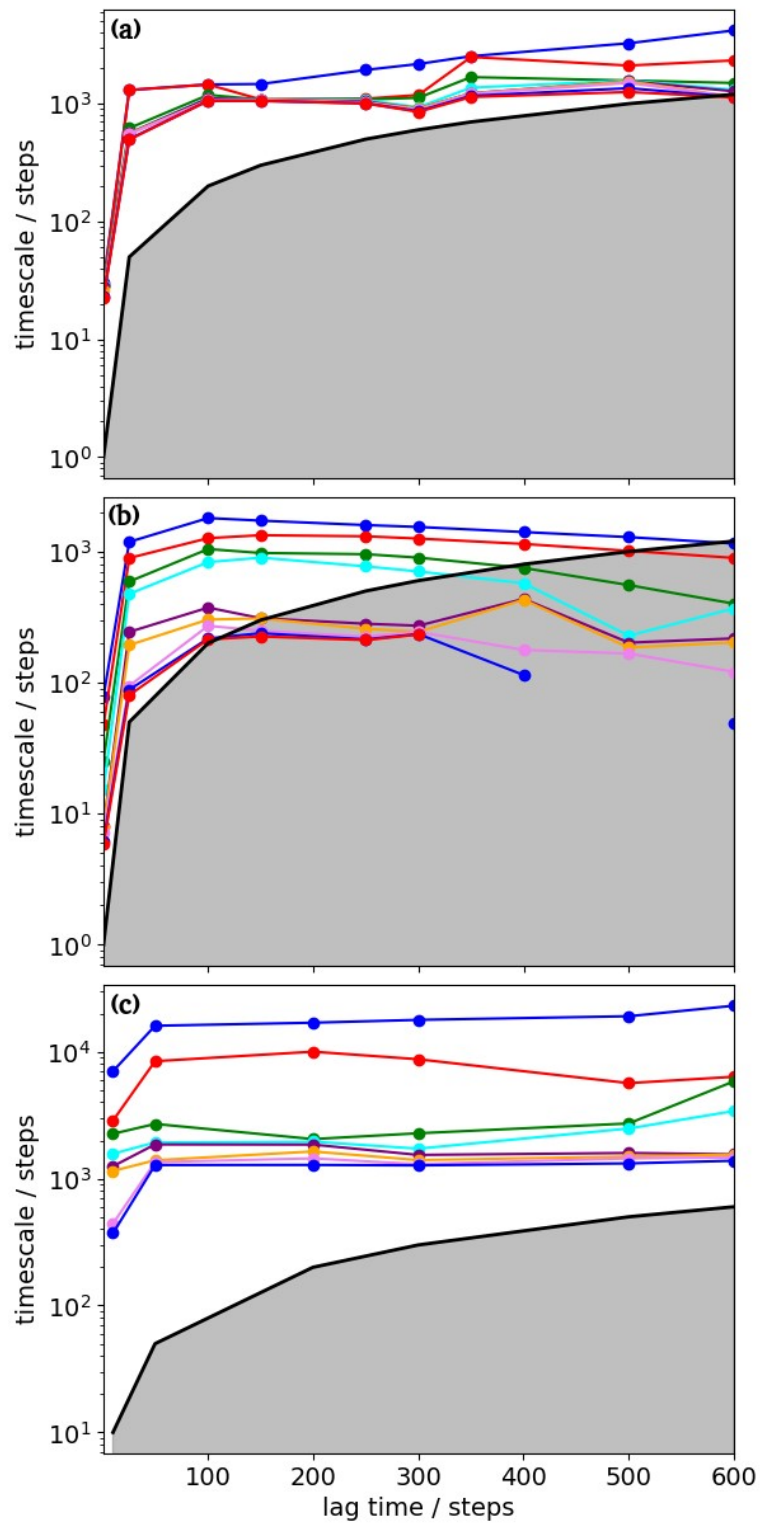

**Supplementary Figure S4:** Chapman Kolmogorov test for whole structure of apo  $\text{tRNA}_3^{\text{Lys}}$ ,  $\text{tRNA}_3^{\text{Lys-1,4T}}$  and  $\text{tRNA}_3^{\text{Lys-1,5T}}$ .

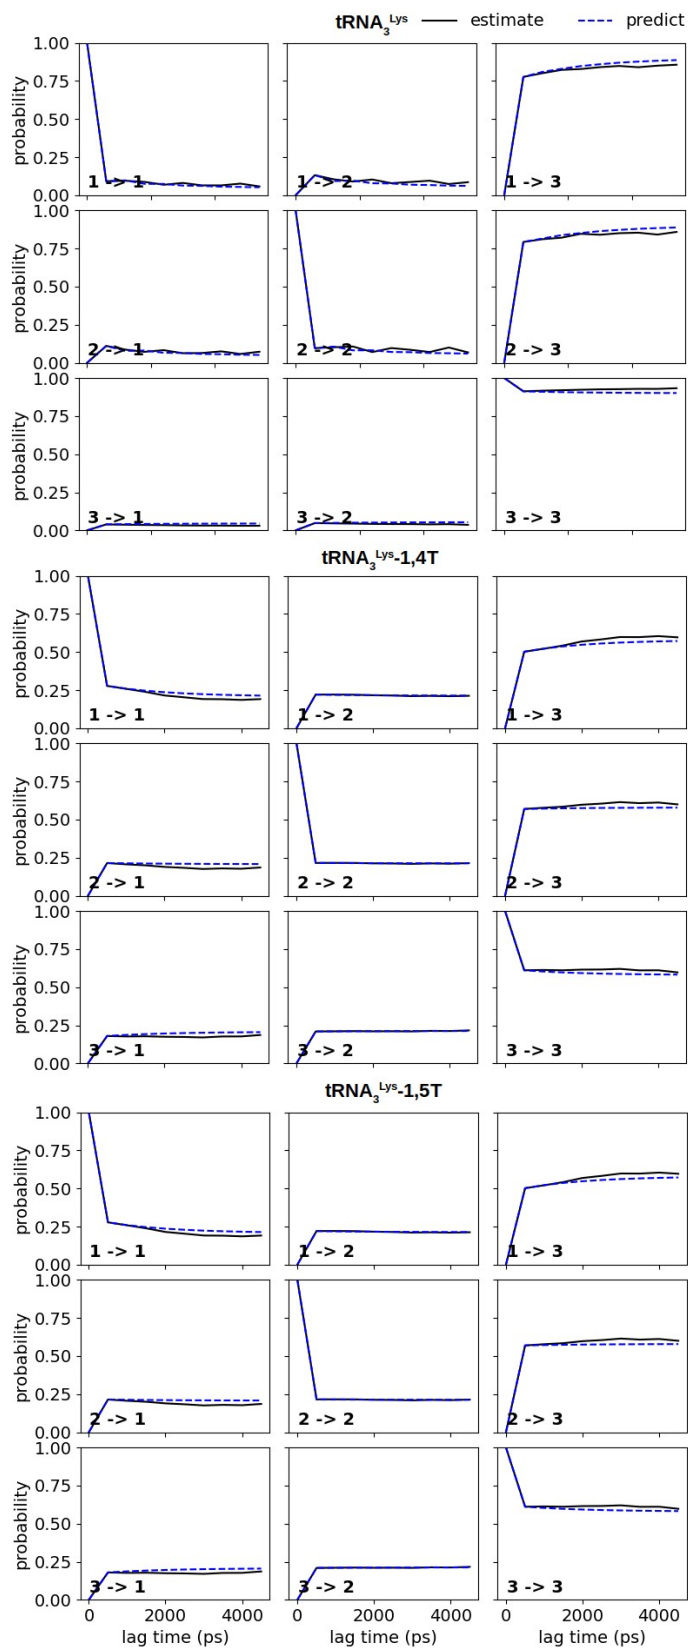

**Supplementary Figure S5:** Chapman Kolmogorov test for DT loop structure of apo tRNA<sub>3</sub><sup>Lys</sup>, tRNA<sub>3</sub><sup>Lys</sup>-1,4T and tRNA<sub>3</sub><sup>Lys</sup>-1,5T.

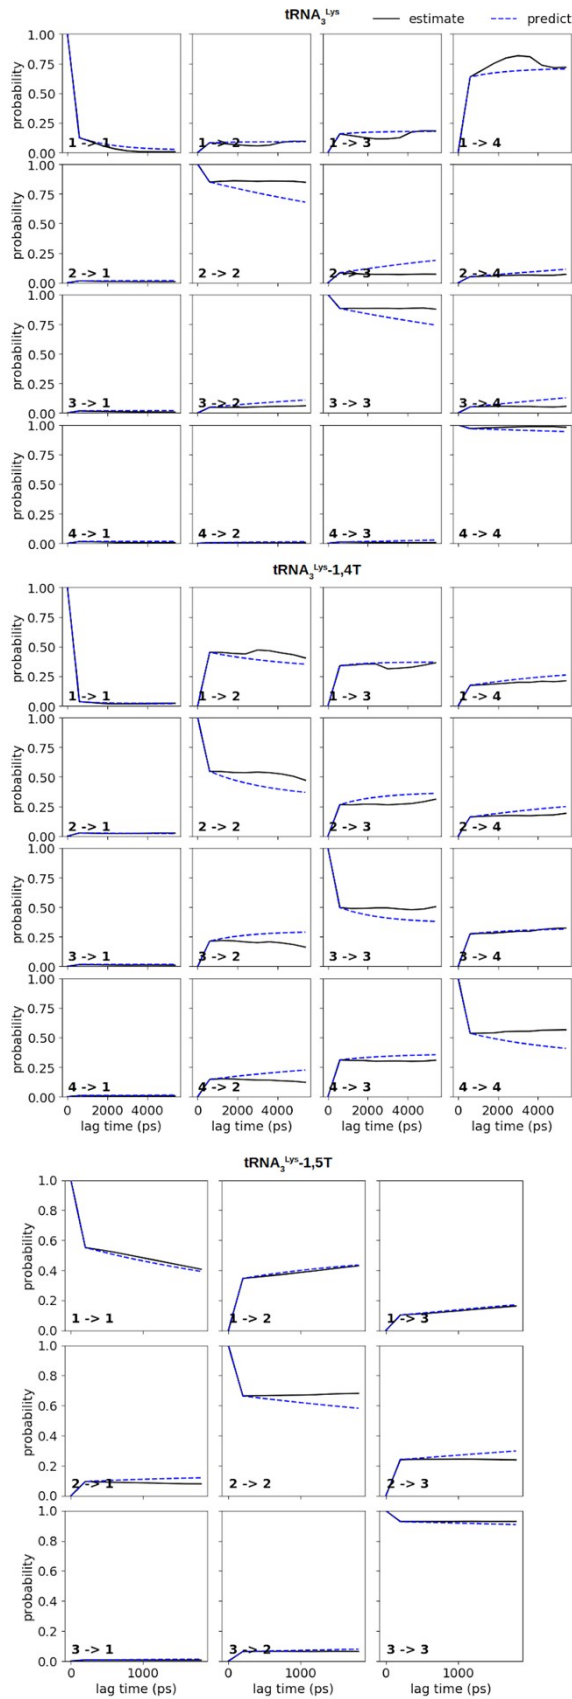

**Supplementary Figure S6:** Docking images of 14T and 15T ligands against different tRNA crystal structures (a) 1FIR-14T, (b) 1FIR-15T, (c) 1EHZ-14T, (d) 1EHZ-15T, (e) 1VTQ-14T, (f) 1VTQ-15T, (g) 3L0U-14T, (h) 3L0U-15T, (i) 4TNA-14T, (j) 4TNA-15T, (k) 3TRA-14T and (l) 3TRA-15T.

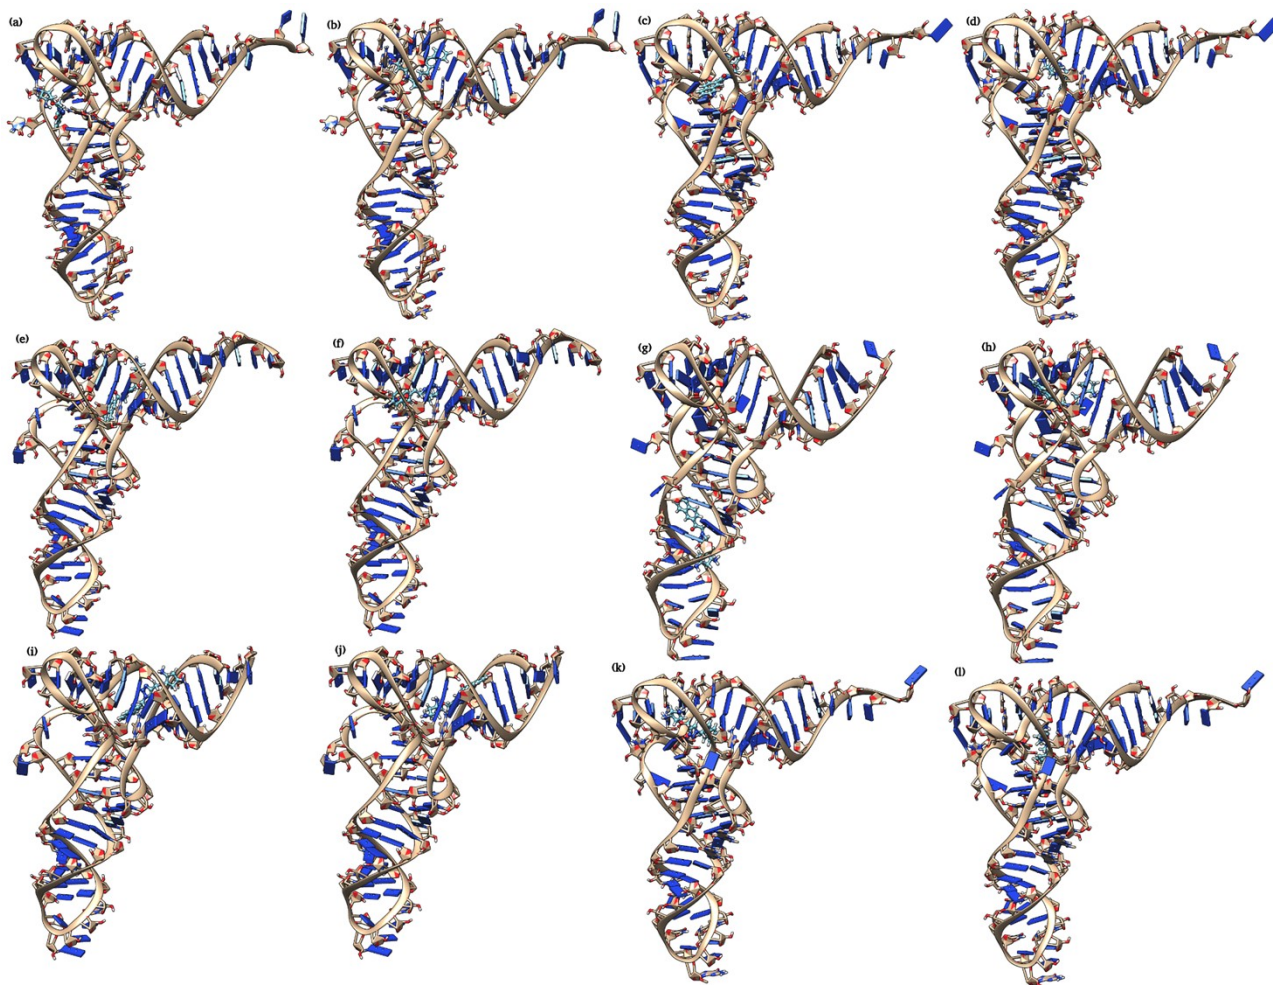

**Supplementary Table S7:** Area under the curve values for three sets of simulations of three complex systems (tRNA<sub>3</sub><sup>Lys</sup> system, tRNA<sub>3</sub><sup>Lys</sup>-1,4T system and tRNA<sub>3</sub><sup>Lys</sup>-1,5T system).

|                | <b>tRNA<sub>3</sub><sup>Lys</sup> system</b> | <b>tRNA<sub>3</sub><sup>Lys</sup> - 1,4T system</b> | <b>tRNA<sub>3</sub><sup>Lys</sup> - 1,5T system</b> |
|----------------|----------------------------------------------|-----------------------------------------------------|-----------------------------------------------------|
| <b>Set – 1</b> | 4480.26                                      | 4351.5                                              | 3753.42                                             |
| <b>Set – 2</b> | 3771.87                                      | 4743.03                                             | 3334.4                                              |
| <b>Set – 3</b> | 4053.13                                      | 4802.13                                             | 3176.96                                             |



**Supplementary Table S8:** Interactions of 1,4T and 1,5T ligands with tRNA<sub>3</sub><sup>Lys</sup> for three runs of simulations.

| Residues | H-bond       | tRNA <sub>3</sub> Lys-1,4T system |              |              | tRNA <sub>3</sub> Lys-1,4T system |              |              |
|----------|--------------|-----------------------------------|--------------|--------------|-----------------------------------|--------------|--------------|
|          |              | Traj1                             | Traj2        | Traj3        | Traj1                             | Traj2        | Traj3        |
| 53-Lig   | O6...H23-N5  | <b>91.07</b>                      |              |              |                                   |              |              |
| 60-Lig   | O2...H22-N5  | <b>77.92</b>                      |              |              |                                   |              |              |
| 60-Lig   | O2P...H22-N5 |                                   | <b>75.15</b> | <b>56.94</b> |                                   |              |              |
| 52-Lig   | O6...H23-N5  |                                   |              | <b>54.37</b> |                                   |              |              |
| 53-Lig   | O6...H23-N5  |                                   | 19.86        |              |                                   |              |              |
| 59-Lig   | O2P...H22-N5 |                                   |              | 8.87         |                                   |              |              |
| 60-Lig   | O2P...H23-N5 |                                   | 8.35         |              |                                   |              |              |
| 51-Lig   | N7...H20-N4  |                                   |              | 6.32         |                                   |              |              |
| 49-Lig   | O1P...H21-N4 |                                   |              | 4.79         |                                   |              |              |
| 58-Lig   | O3'...H23-N5 |                                   |              | 4.69         |                                   |              |              |
| 58-Lig   | O3'...H22-N5 |                                   |              | 4.68         |                                   |              |              |
| 50-Lig   | N6-H62...O1  |                                   |              |              |                                   | <b>46.77</b> |              |
| 50-Lig   | N6-H61...O1  |                                   |              |              |                                   | <b>45.98</b> |              |
| 50-Lig   | N6-H62...N1  |                                   |              |              | 4.66                              |              | <b>44.58</b> |
| 50-Lig   | N6-H62...N3  |                                   |              |              | 8.32                              |              | 37.20        |
| 50-Lig   | N6-H61...N1  |                                   |              |              | 4.86                              |              | 35.81        |
| 50-Lig   | N6-H61...N3  |                                   |              |              | 7.69                              |              | 29.34        |
| 50-Lig   | N6-H62...O1  |                                   |              |              | 27.90                             |              |              |
| 50-Lig   | N6-H61...O1  |                                   |              |              | 27.72                             |              |              |
| 61-Lig   | N4-H42...N3  |                                   |              |              | 23.21                             |              |              |
| 61-Lig   | N4-H42...N1  |                                   |              |              | 23.17                             |              |              |
| 50-Lig   | O5'...H22-N5 |                                   |              |              |                                   | 19.36        | 21.63        |
| 61-Lig   | N4-H41...N1  |                                   |              |              | 15.06                             |              |              |
| 61-Lig   | N4-H41...N3  |                                   |              |              | 8.57                              |              |              |
| 51-Lig   | O2P...H22-N5 |                                   |              |              |                                   | 7.71         |              |
| 64-Lig   | N3-H3...O1   |                                   |              |              |                                   | 3.96         |              |
| 61-Lig   | N4-H42...O1  |                                   |              |              | 3.11                              |              |              |
| 62-Lig   | N4-H41...N1  |                                   |              |              |                                   |              | 2.95         |

**Supplementary Figure S9:** Distances of  $Mg^{++}$  ion interactions with the ligands 1,4T and 1,5T from the respective systems.

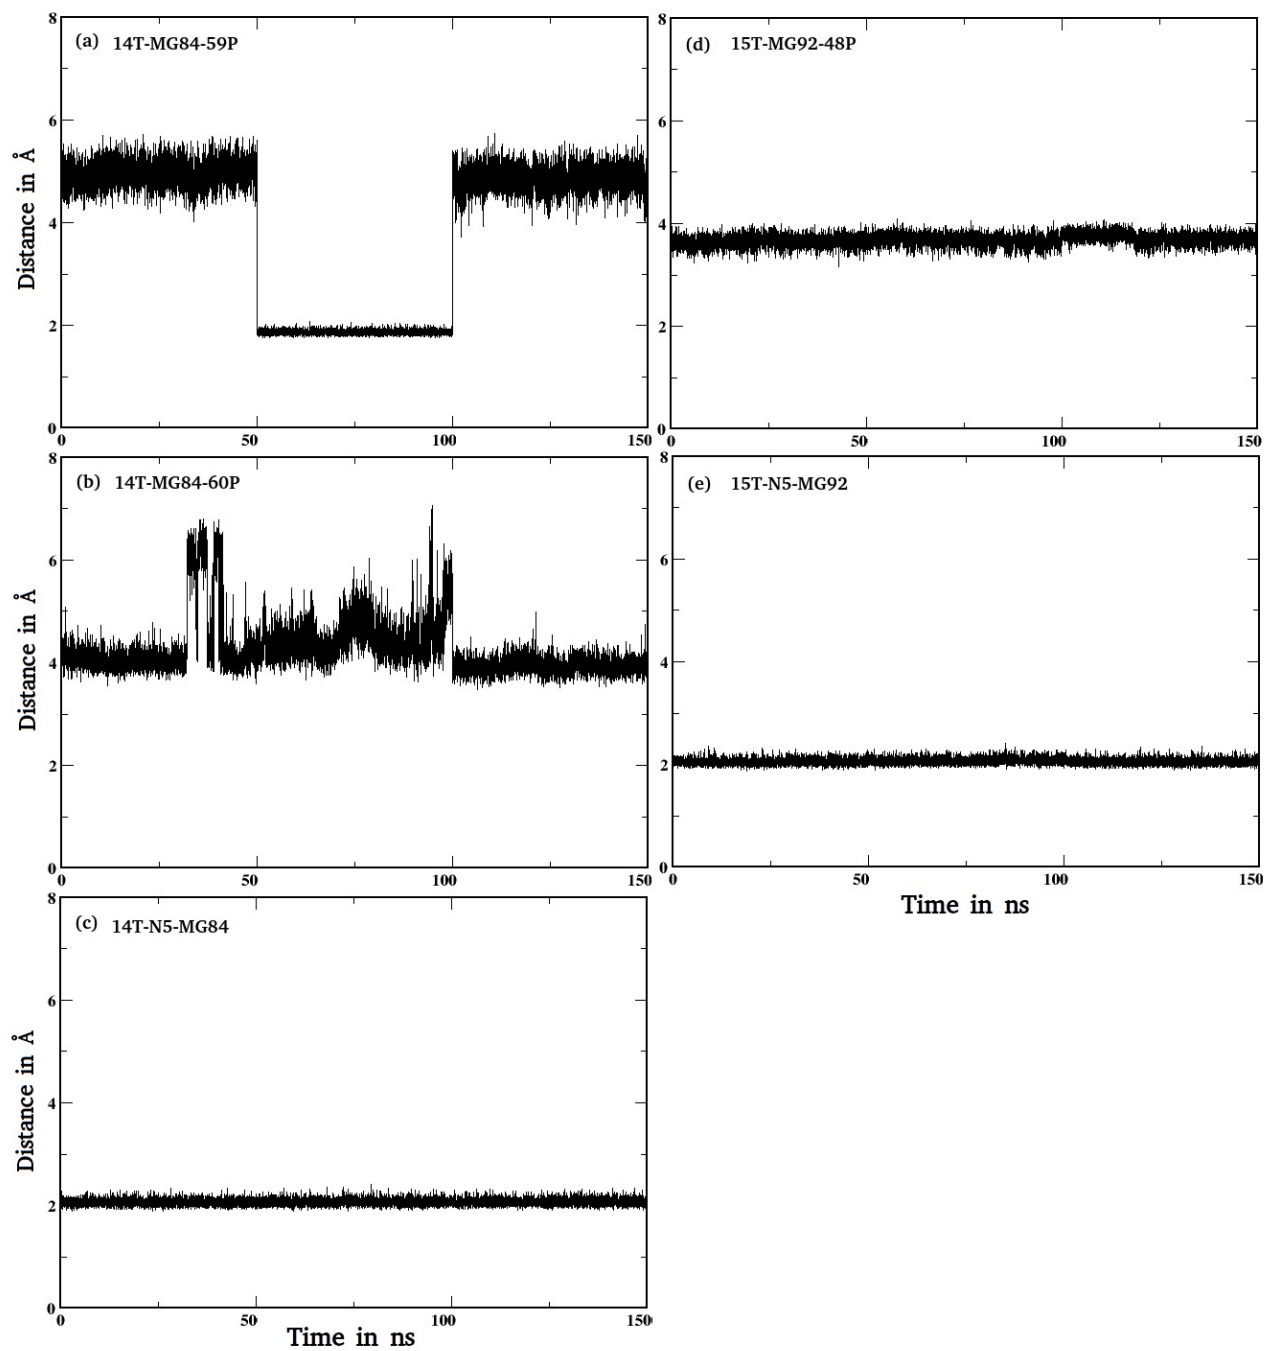

**Supplementary Figure S10:** The number of water molecules present within the close proximity of the ligand bound tRNA<sub>3</sub><sup>Lys</sup> systems. The distance between solute molecules and the water considered for lower is  $\leq 3.4$  Å and for upper is  $\leq 5$  Å.

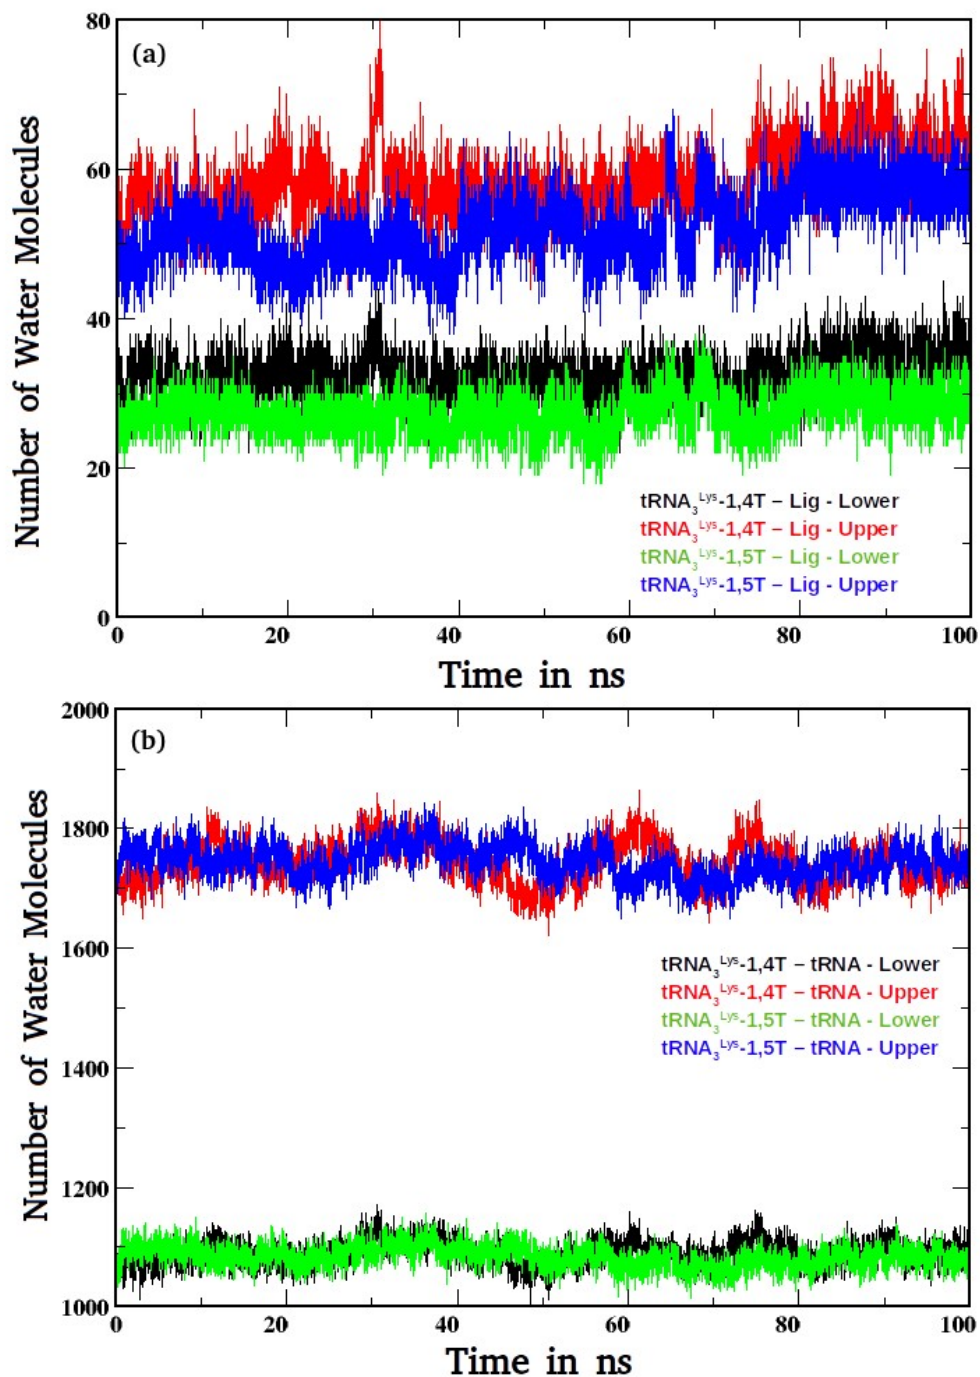

**Supplementary Table S11:** Water mediated interactions in three systems (tRNA<sub>3</sub><sup>Lys</sup> system, tRNA<sub>3</sub><sup>Lys</sup>-1,4T system and tRNA<sub>3</sub><sup>Lys</sup>-1,5T system) above 40% of residence time from all the three trajectories.

**tRNA<sub>3</sub><sup>Lys</sup> system**

| Donor      | Acceptor H | Acceptor | Traj-1 | Traj-2 | Traj-3 |
|------------|------------|----------|--------|--------|--------|
| 2MG_6@O2P  | WAT@H1     | WAT@O    | 60.12  |        |        |
| RG_5@O2P   | WAT@H2     | WAT@O    | 57.53  |        |        |
| RG_15@N7   | WAT@H2     | WAT@O    | 50.34  | 42.47  | 42.52  |
| RG_53@O6   | WAT@H2     | WAT@O    | 49.07  |        | 44.88  |
| RG_53@O6   | WAT@H1     | WAT@O    | 48.59  |        | 46.40  |
| RG_15@N7   | WAT@H1     | WAT@O    | 48.42  | 52.57  | 46.53  |
| H2U_47@O1P | WAT@H1     | WAT@O    | 45.87  |        |        |
| 2MG_6@O1P  | WAT@H2     | WAT@O    | 42.52  |        |        |
| 2MG_6@O1P  | WAT@H1     | WAT@O    | 41.27  |        |        |
| 5MC_48@O2' | WAT@H2     | WAT@O    | 40.52  |        |        |
| RA_7@O2P   | WAT@H2     | WAT@O    | 40.01  |        |        |
| WAT@O      | RC_61@H42  | RC_61@N4 | 41.24  |        |        |
| RC_62@O2P  | WAT@H1     | WAT@O    |        | 50.03  | 47.84  |
| RU_8@O4    | WAT@H2     | WAT@O    |        | 44.44  |        |
| RG_15@O6   | WA@H2      | WAT@O    |        | 43.99  | 45.59  |
| RC_62@O2P  | WAT0@H2    | WAT@O    |        | 43.88  | 49.20  |
| RG_15@O6   | WAT@H1     | WAT@O    |        | 42.48  | 42.93  |
| 12A_37@O2P | WAT@H2     | WAT@O    |        | 40.09  |        |
| RU_66@O4   | WAT@H2     | WAT@O    |        |        | 49.38  |
| RU_66@O4   | WAT@H1     | WAT@O    |        |        | 45.75  |
| RC_3@O1P   | WAT@H1     | WAT@O    |        |        | 42.86  |
| RC_4@O2P   | WAT@H1     | WAT@O    |        |        | 41.03  |

**tRNA<sub>3</sub><sup>Lys</sup> - 1,4T system**

| Donor      | Acceptor H | Acceptor | Traj-1 | Traj-2 | Traj-3 |
|------------|------------|----------|--------|--------|--------|
| WAT@O      | RC_13@H41  | RC_13@N4 | 77.85  |        |        |
| WAT@O      | RG_59@H1   | RG_59@N1 | 55.51  |        |        |
| 1MA_58@O3' | WAT@H1     | WAT@O    | 63.22  |        |        |
| RG_59@O2P  | WAT@H1     | WAT@O    | 58.36  |        |        |

|            |           |          |       |       |       |
|------------|-----------|----------|-------|-------|-------|
| RG_24@O2P  | WAT@H2    | WAT@O    | 45.67 |       |       |
| RG_53@N7   | WAT@H1    | WAT@O    | 45.48 |       |       |
| RG_53@N7   | WAT@H2    | WAT@O    | 44.23 |       |       |
| RA_9@O2P   | WAT@H1    | WAT@O    | 43.79 |       |       |
| RU_12@O2P  | WAT@H2    | WAT@O    | 43.62 |       |       |
| 5MC_48@N3  | WAT@H1    | WAT@O    | 41.93 |       |       |
| RC_68@N3   | WAT@H1    | WAT@O    | 41.33 |       |       |
| RA_9@O2P   | WAT@H2    | WAT@O    | 41.17 |       |       |
| RU_12@O2P  | WAT@H1    | WAT@O    | 40.88 |       |       |
| 5MC_48@N3  | WAT@H2    | WAT@O    | 40.38 |       |       |
| RU_8@O1P   | WAT@H1    | WAT@O    |       | 41.95 |       |
| RG_24@O2P  | WAT@H1    | WAT@O    |       | 61.65 |       |
| RC_11@O1P  | WAT@H2    | WAT@O    |       | 44.94 |       |
| RU_8@O1P   | WAT@H2    | WAT@O    |       | 42.75 |       |
| RC_11@O1P  | WAT@H1    | WAT@O    |       | 46.06 |       |
| PSU_55@O4  | WAT@H2    | WAT@O    |       | 41.71 |       |
| PSU_55@O4  | WAT@H1    | WAT@O    |       | 41.27 |       |
| 1MA_58@O3' | WAT@H2    | WAT@O    |       |       | 47.21 |
| RA_9@O2P   | WAT@H1    | WAT@O    |       |       | 41.78 |
| RU_12@O2P  | WAT@H2    | WAT@O    |       |       | 41.19 |
| RG_59@O2P  | WAT@H2    | WAT@O    |       |       | 40.98 |
| RA_9@O2P   | WAT@H2    | WAT@O    |       |       | 40.23 |
| WAT@O      | RC_13@H41 | RC_13@N4 |       |       | 76.13 |

**tRNA<sub>3</sub><sup>Lys</sup> - 1,5T system**

| <b>Donor</b> | <b>Acceptor H</b> | <b>Acceptor</b> | <b>Traj-1</b> | <b>Traj-2</b> | <b>Traj-3</b> |
|--------------|-------------------|-----------------|---------------|---------------|---------------|
| 1MA_58@O3'   | WAT@H2            | WAT@O           | 54.41         |               |               |
| 2MG_6@O2P    | WAT@H2            | WAT@O           | 47.51         |               |               |
| RG_59@O2P    | WAT@H2            | WAT@O           | 47.05         |               |               |
| RG_59@N7     | WAT@H2            | WAT@O           | 45.21         |               |               |
| 1MA_58@O1P   | WAT@H1            | WAT@O           | 44.89         |               |               |
| 2MG_6@O2P    | WAT@H1            | WAT@O           | 42.95         |               |               |
| RG_15@N7     | WAT@H2            | WAT@O           | 41.87         |               |               |
| RG_59@N7     | WAT@H1            | WAT@O           | 41.30         |               |               |

|            |           |           |       |       |
|------------|-----------|-----------|-------|-------|
| RG_15@N7   | WAT@H1    | WAT@O     | 40.95 |       |
| RU_33@O4   | WAT@H1    | WAT@O     |       | 41.16 |
| RU_33@O4   | WAT@H2    | WAT@O     |       | 40.42 |
| WAT@O      | RC_11@H42 | RC_11@N4  | 44.92 |       |
| RG_15@N7   | WAT@H2    | WAT@O     |       | 51.55 |
| RU_8@O4    | WAT@H1    | WAT@O     | 51.43 | 44.98 |
| RG_15@N7   | WAT@H1    | WAT@O     |       | 47.63 |
| RU_8@O4    | WAT@H2    | WAT@O     |       | 47.57 |
| PSU_27@O4  | WAT@H2    | WAT@O     |       | 43.35 |
| PSU_27@O4  | WAT@H1    | WAT@O     |       | 41.91 |
| RA_57@O2P  | WAT@H2    | WAT@O     |       | 41.52 |
| RG_15@O6   | WAT@H1    | WAT@O     |       | 40.93 |
| WAT@O      | PSU_27@H5 | PSU_27@N5 |       | 52.41 |
| PSU_27@O2P | WAT@H1    | WAT@O     |       | 58.19 |
| RC_11@O1P  | WAT@H2    | WAT@O     |       | 49.39 |
| 2MG_6@O1P  | WAT@H2    | WAT@O     |       | 45.63 |
| RA_57@O1P  | WAT@H1    | WAT@O     |       | 43.12 |
| RC_11@O1P  | WAT@H1    | WAT@O     |       | 42.09 |
| RA_7@O5'   | WAT@H2    | WAT@O     |       | 41.77 |
| PSU_27@O2P | WAT@H2    | WAT@O     |       | 41.67 |
| RC_28@O2P  | WAT@H1    | WAT@O     |       | 41.66 |
| RA_7@O5'   | WAT@H1    | WAT@O     |       | 41.31 |
| RA_57@O1P  | WAT@H2    | WAT@O     |       | 40.02 |

**Supplementary Table S12:** MMGBSA free energy components of tRNA<sub>3</sub><sup>Lys</sup>-14T and tRNA<sub>3</sub><sup>Lys</sup>-15T system for three sets of MD simulations.

| <b>MMGBSA- Free Energy Components</b>     |                |              |              |
|-------------------------------------------|----------------|--------------|--------------|
| <b>tRNA<sub>3</sub><sup>Lys</sup>-14T</b> | <b>Set - 1</b> | <b>Set-2</b> | <b>Set-3</b> |
| <b>BOND</b>                               | -5.6183        | -6.7418      | -6.4972      |
| <b>ANGLE</b>                              | -6.7446        | -6.6416      | -6.5458      |
| <b>DIHED</b>                              | -59.3688       | -59.8953     | -59.5319     |
| <b>VDWAALS</b>                            | -30.8807       | -31.2762     | -30.3163     |
| <b>EEL</b>                                | -3.3843        | 4.04         | -4.0114      |
| <b>EGB</b>                                | 42.3723        | 43.8491      | 41.8662      |
| <b>ESURF</b>                              | -4.4082        | -4.2994      | -4.2646      |
| <b>DELTA G gas</b>                        | -102.1482      | -96.6784     | -102.9906    |
| <b>DELTA G solv</b>                       | 37.9641        | 39.5497      | 37.6015      |
| <b>DELTA TOTAL</b>                        | -64.1842       | -57.1287     | -65.3891     |
| <b>tRNA<sub>3</sub><sup>Lys</sup>-15T</b> | <b>Set - 1</b> | <b>Set-2</b> | <b>Set-3</b> |
| <b>BOND</b>                               | -6.5776        | -6.8163      | -6.7945      |
| <b>ANGLE</b>                              | -6.9637        | -6.8247      | -6.7261      |
| <b>DIHED</b>                              | -60.0581       | -59.1454     | -59.5388     |
| <b>VDWAALS</b>                            | -35.852        | -30.8996     | -41.3142     |
| <b>EEL</b>                                | -18.1354       | 0.3625       | 15.8677      |
| <b>EGB</b>                                | 95.4041        | 79.9155      | 64.8676      |
| <b>ESURF</b>                              | -5.2023        | -4.5222      | -4.8998      |
| <b>DELTA G gas</b>                        | -123.7378      | -99.4339     | -94.686      |
| <b>DELTA G solv</b>                       | 90.2018        | 75.3933      | 59.9678      |
| <b>DELTA TOTAL</b>                        | -33.536        | -24.0407     | -34.7183     |

**Supplementary Figure S13:** The G6-U67 base pair distance for (a) tRNA<sub>3</sub><sup>Lys</sup>, (b) tRNA<sub>3</sub><sup>Lys-1,4T</sup> and (c) tRNA<sub>3</sub><sup>Lys-1,5T</sup>.

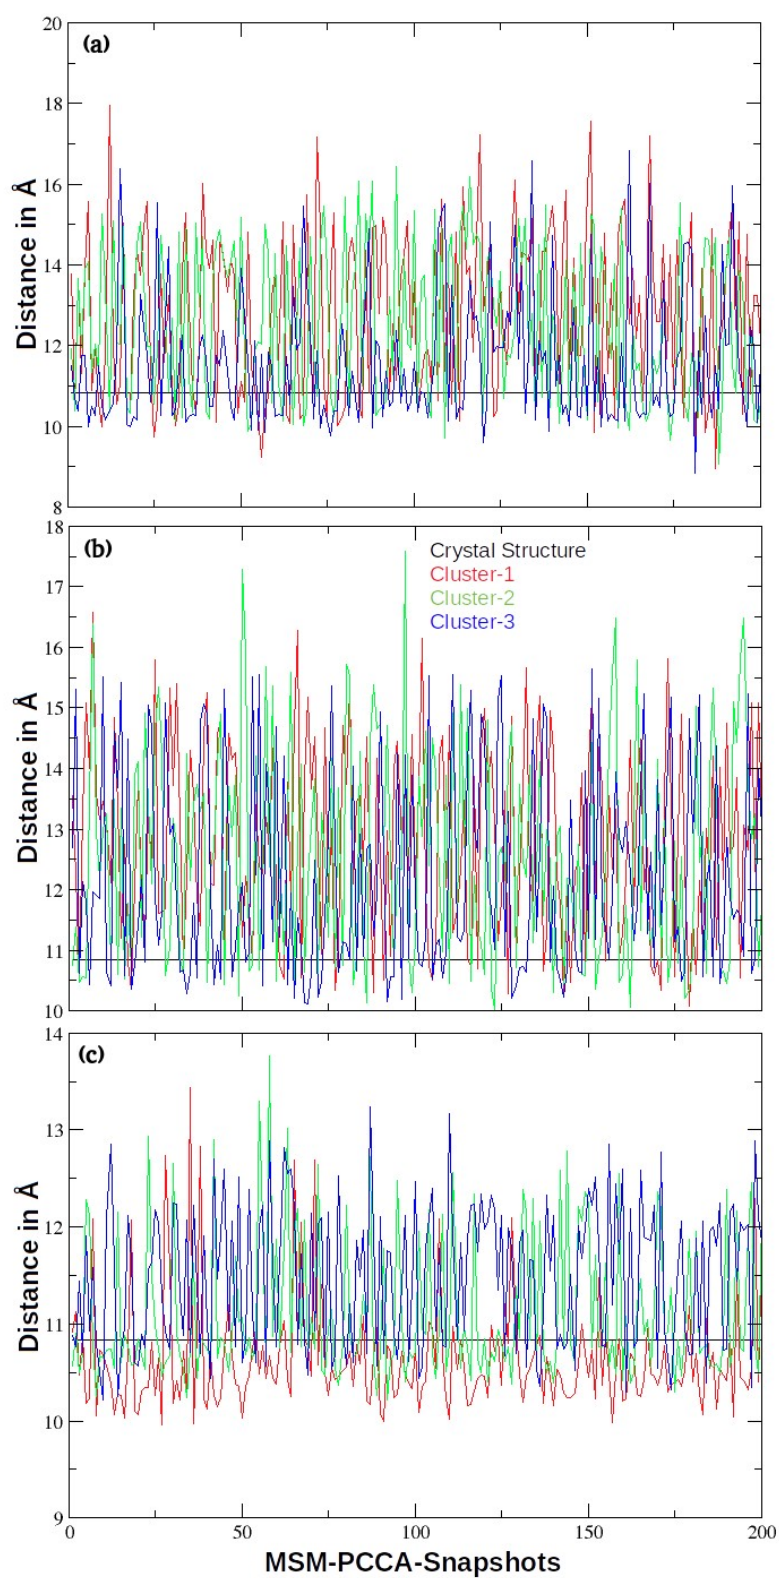



**Supplementary Figure S14:** The C11-G45 base pair distance for (a) tRNA<sub>3</sub><sup>Lys</sup>, (b) tRNA<sub>3</sub><sup>Lys-1,4T</sup> and (c) tRNA<sub>3</sub><sup>Lys-1,5T</sup>.

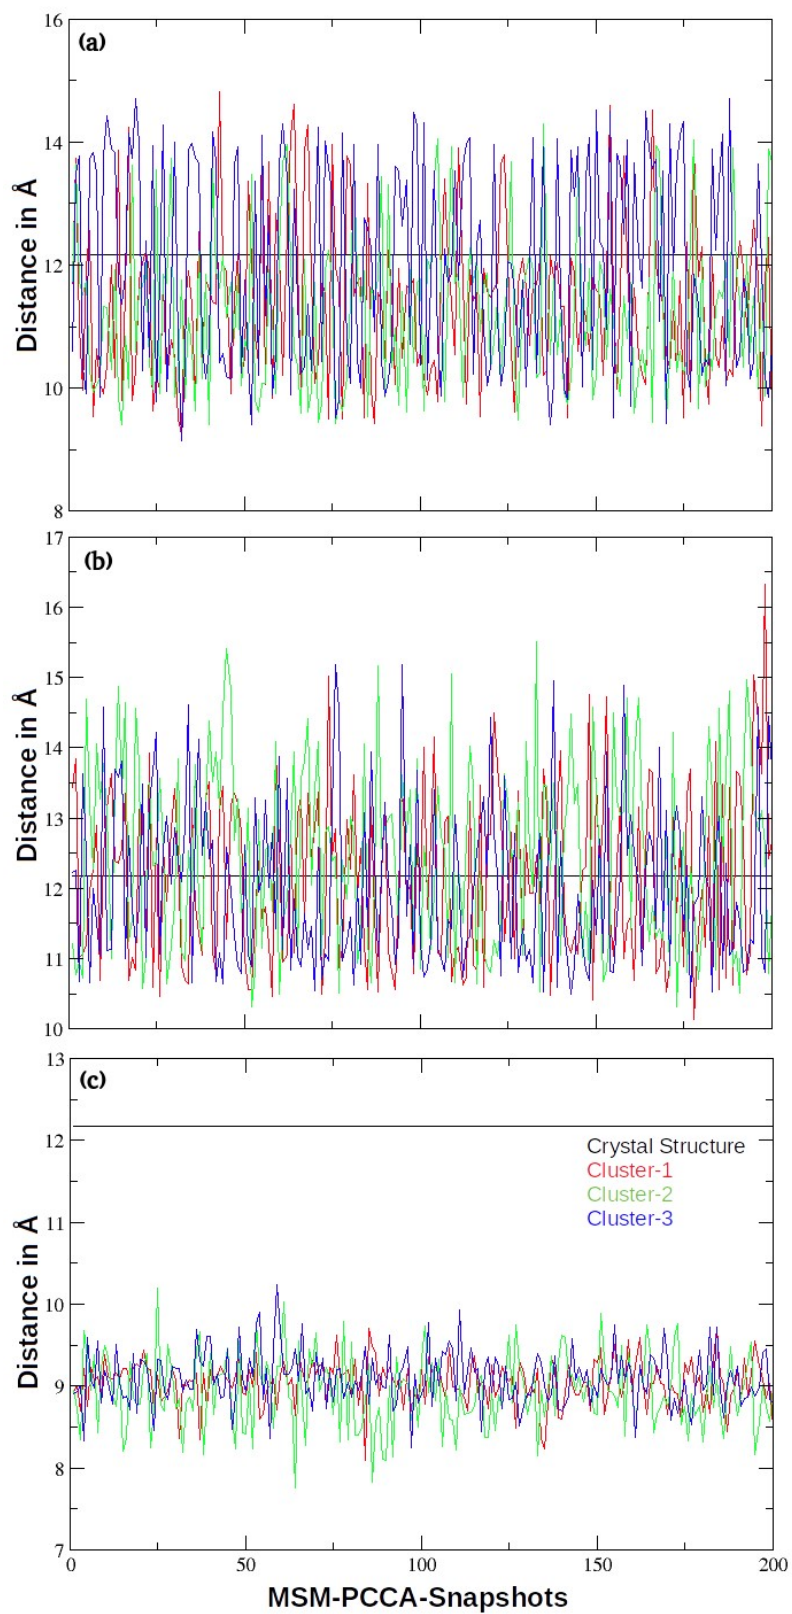

**Supplementary Figure S15:** The docked poses of 1,4T and 1,5T ligands against three representative structures, one from each MSM macrostate.

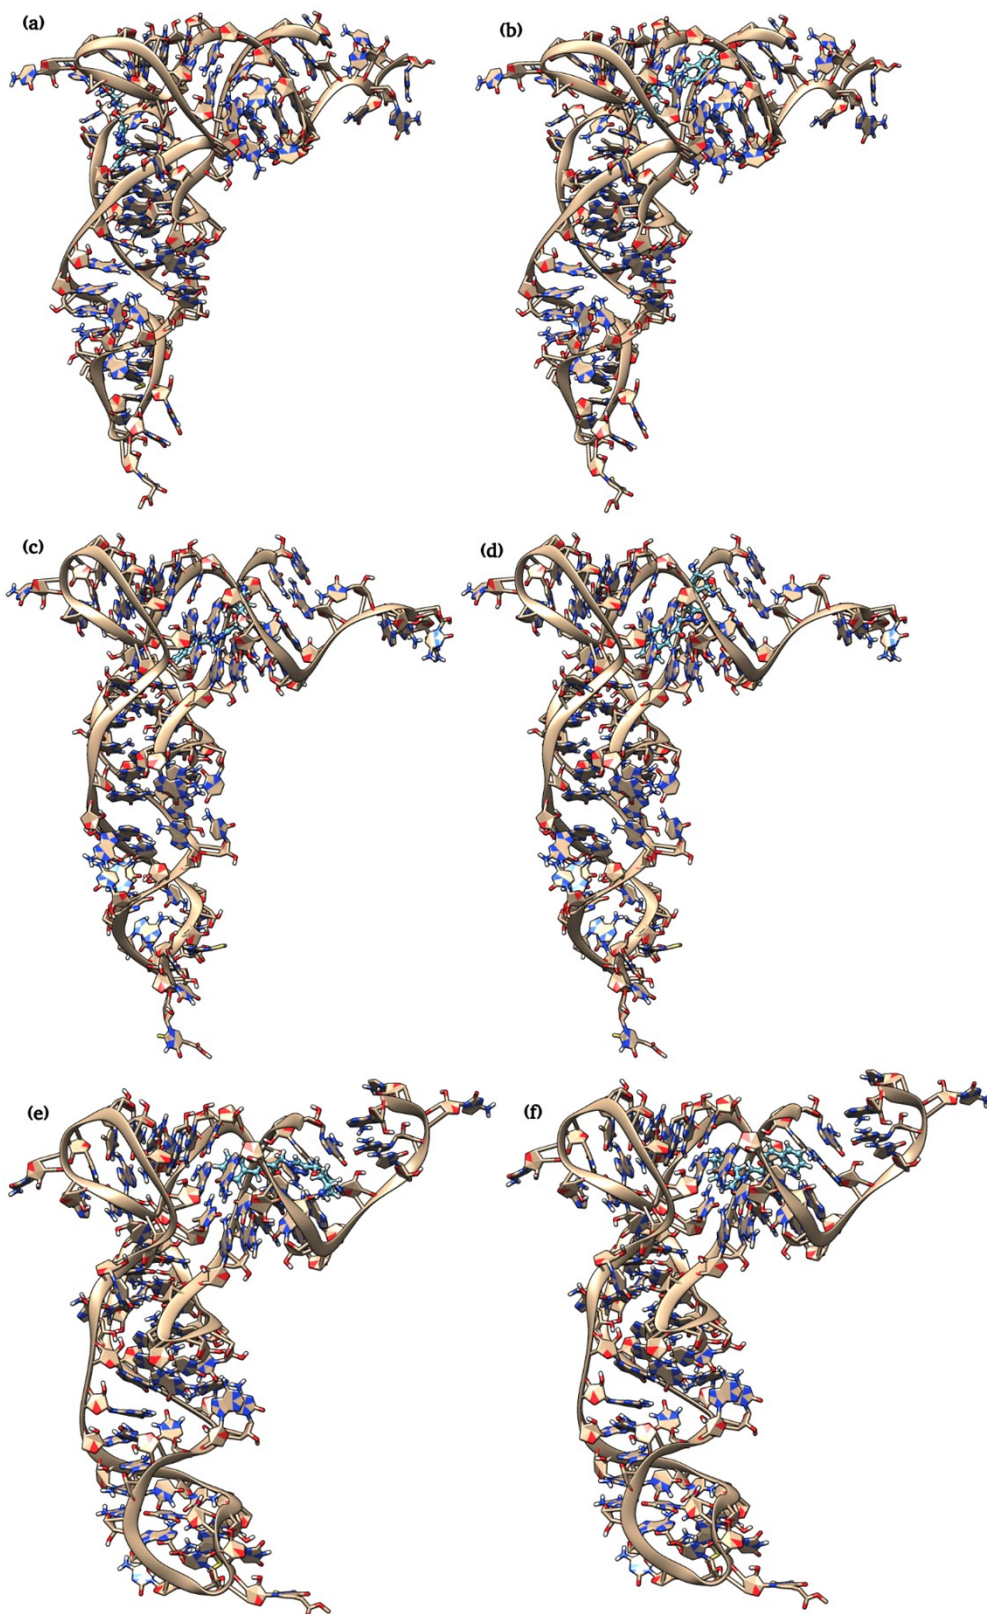

**Supplementary Figure S16:** The RMSD of anticodon loop region of the tRNA<sub>3</sub><sup>Lys</sup> for all three systems. (a) Run-1, (b) Run-2 (c) Run-3.

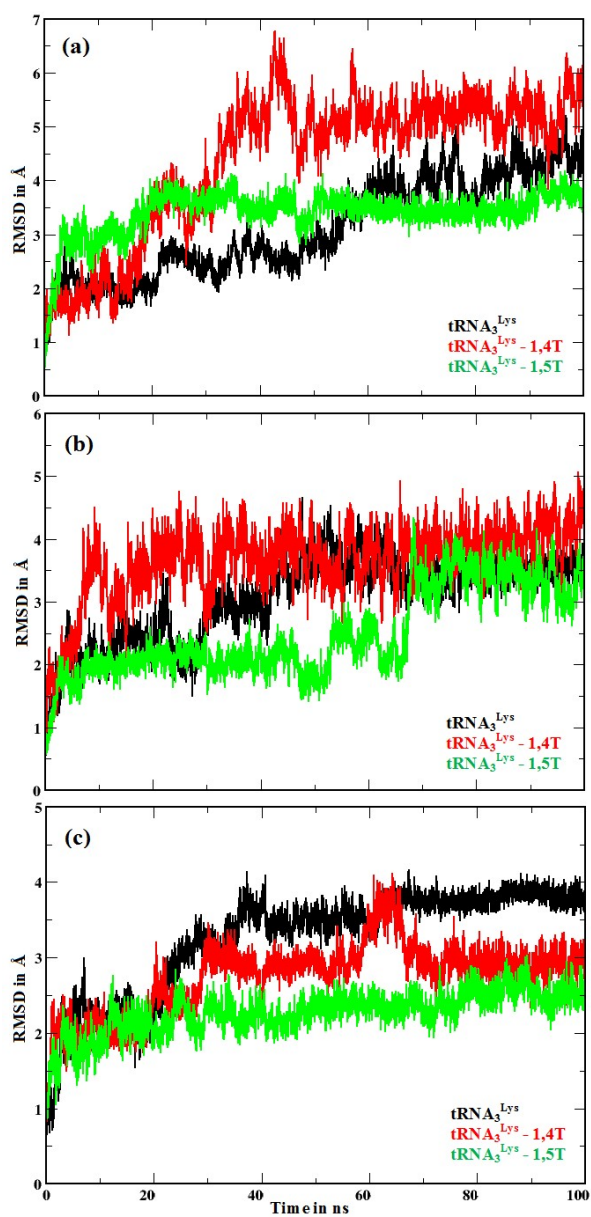



**Supplementary Figure S17:** MSM macrostates and MFPT rates for D and TΨC loop of apo tRNA<sub>3</sub><sup>Lys</sup>. The D and TΨC loop are represented in red and green colours respectively.

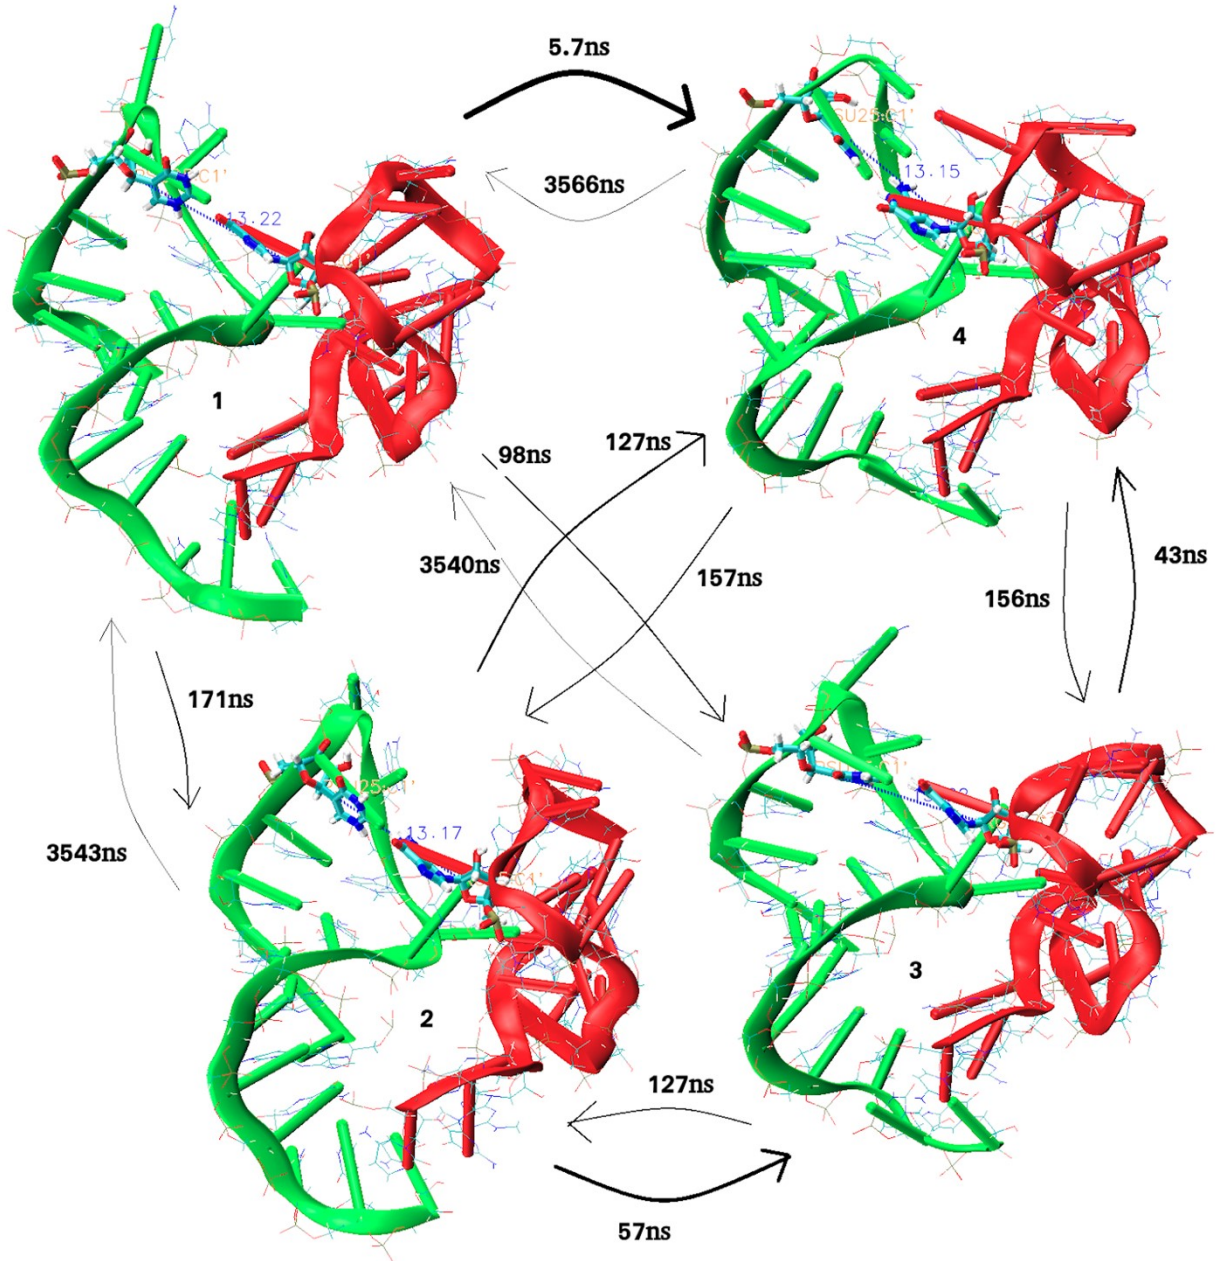

**Supplementary Figure S18:** MSM macrostates and MFPT rates for D and TΨC loop of tRNA<sub>3</sub><sup>Lys</sup>-1,4T.

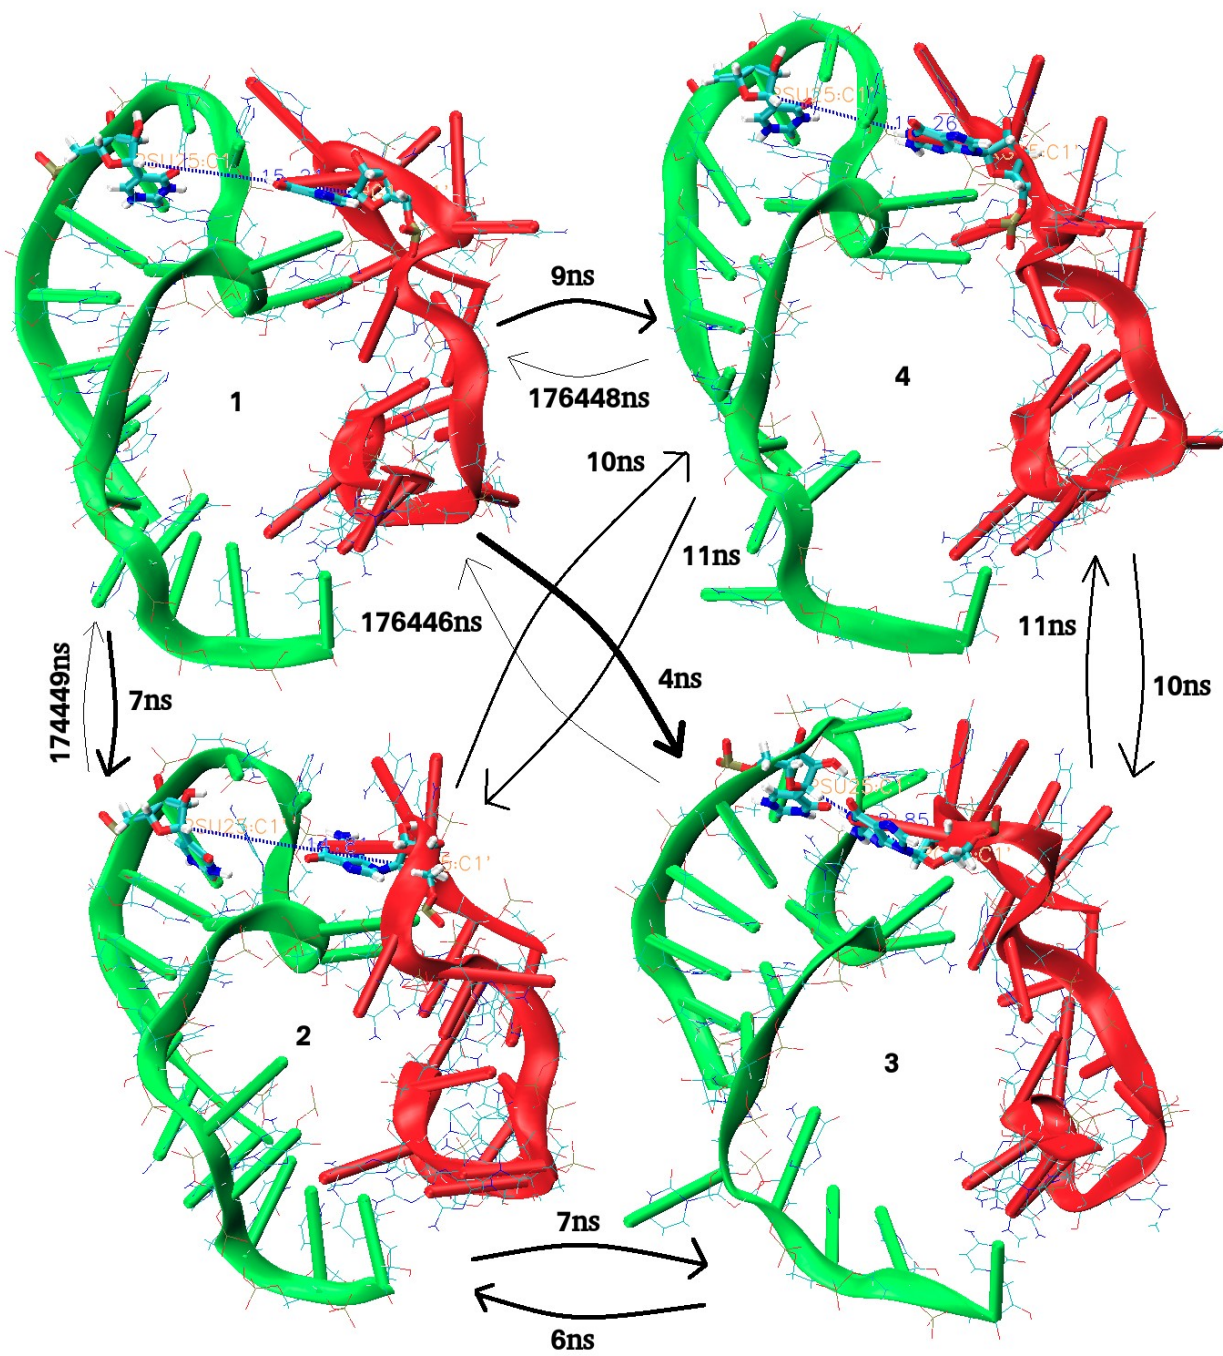

**Supplementary Figure S19:** MSM macrostates and MFPT rates for D and TΨC loop of tRNA<sub>3</sub><sup>Lys</sup>-1,5T.

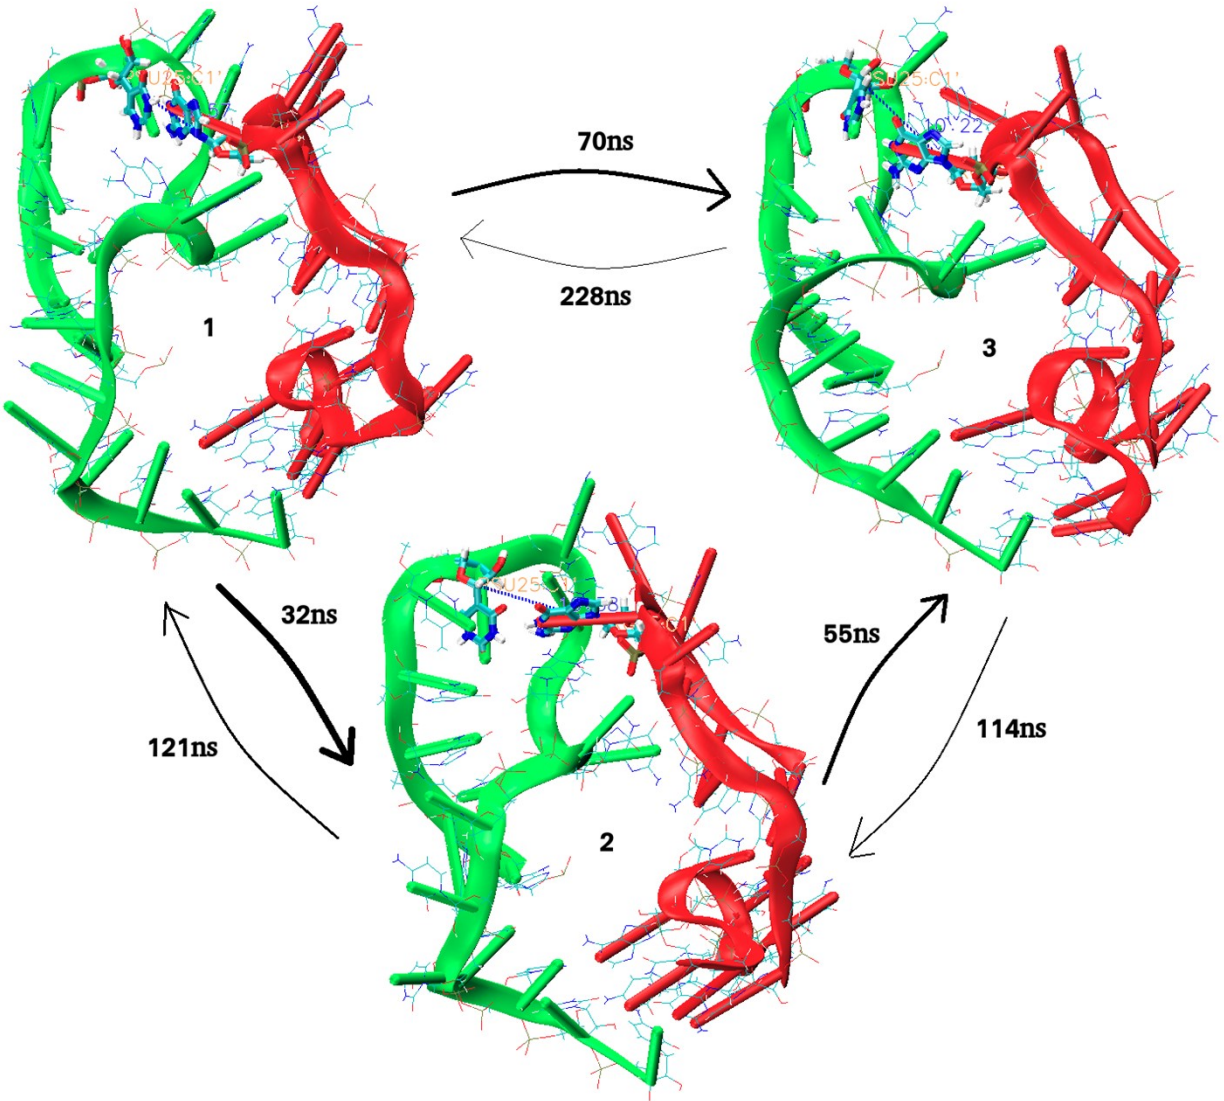

Supplement: d3ra03694d1.pdf [file d3ra03694d1.pdf]
